# Supplementary material for: TogoVar: A comprehensive Japanese genetic variation database
Source: PubMed Central journal article supplement (PMC9744889; doi:10.1038/s41439-022-00222-9), 2022-12-12
Supplement: 41439_2022_222_MOESM1_ESM.pdf [file 41439_2022_222_MOESM1_ESM.pdf]

## Supplementary Fig.1 Number of variants per clinical significance

**a** In the Clinical significance box, the number of variants per clinical significance is displayed for 1,052,579 ClinVar variants in TogoVar. Note that the number is counted for each significance when two or more clinical significances are assigned to one variant.

**b** The number per clinical significance for 123,160 variants included in the five datasets of JPN\_UNION is displayed.

**a**

### Statistics / Filters Reset

| Dataset                             |                    | ^         |
|-------------------------------------|--------------------|-----------|
| <input type="checkbox"/>            | All                | 1,052,579 |
| <input type="checkbox"/>            | WGS GEM-J WGA      | 138,718   |
| <input type="checkbox"/>            | WES JGA NGS        | 56,079    |
| <input type="checkbox"/>            | SNP JGA SNP        | 19,190    |
| <input type="checkbox"/>            | WGS ToMMo 8.3KJPN  | 146,704   |
| <input type="checkbox"/>            | WES HGVD           | 51,670    |
| <input type="checkbox"/>            | WGS gnomAD genomes | 422,465   |
| <input type="checkbox"/>            | WES gnomAD exomes  | 521,805   |
| <input checked="" type="checkbox"/> | Disease ClinVar    | 1,052,579 |

**Alternative allele frequency** v

**Variant calling quality** v

**Variant type** v

**Clinical significance** ^

|                                     |                                              |           |
|-------------------------------------|----------------------------------------------|-----------|
| <input checked="" type="checkbox"/> | All                                          | 1,052,579 |
| <input checked="" type="checkbox"/> | Not in ClinVar                               | 0         |
| <input checked="" type="checkbox"/> | Pathogenic                                   | 154,665   |
| <input checked="" type="checkbox"/> | Likely pathogenic                            | 77,153    |
| <input checked="" type="checkbox"/> | Uncertain significance                       | 601,500   |
| <input checked="" type="checkbox"/> | Likely benign                                | 404,249   |
| <input checked="" type="checkbox"/> | Benign                                       | 206,181   |
| <input checked="" type="checkbox"/> | Conflicting interpretations of pathogenicity | 18,709    |
| <input checked="" type="checkbox"/> | Drug response                                | 2,228     |
| <input checked="" type="checkbox"/> | Association                                  | 365       |
| <input checked="" type="checkbox"/> | Risk factor                                  | 771       |
| <input checked="" type="checkbox"/> | Protective                                   | 74        |
| <input checked="" type="checkbox"/> | Affects                                      | 192       |
| <input checked="" type="checkbox"/> | Other                                        | 1,213     |
| <input checked="" type="checkbox"/> | Not provided                                 | 17,833    |
| <input checked="" type="checkbox"/> | Association_not found                        | 2         |

**Consequence** ^

**b**

### Statistics / Filters Reset

| Dataset                             |                    | ^       |
|-------------------------------------|--------------------|---------|
| <input type="checkbox"/>            | All                | 123,160 |
| <input checked="" type="checkbox"/> | WGS GEM-J WGA      | 101,183 |
| <input checked="" type="checkbox"/> | WES JGA NGS        | 31,297  |
| <input checked="" type="checkbox"/> | SNP JGA SNP        | 12,964  |
| <input checked="" type="checkbox"/> | WGS ToMMo 8.3KJPN  | 104,709 |
| <input checked="" type="checkbox"/> | WES HGVD           | 47,402  |
| <input type="checkbox"/>            | WGS gnomAD genomes | 94,795  |
| <input type="checkbox"/>            | WES gnomAD exomes  | 87,336  |
| <input type="checkbox"/>            | Disease ClinVar    | 123,160 |

**Alternative allele frequency** v

**Variant calling quality** v

**Variant type** v

**Clinical significance** ^

|                                     |                                              |         |
|-------------------------------------|----------------------------------------------|---------|
| <input type="checkbox"/>            | All                                          | 123,160 |
| <input type="checkbox"/>            | Not in ClinVar                               | 0       |
| <input checked="" type="checkbox"/> | Pathogenic                                   | 5,466   |
| <input checked="" type="checkbox"/> | Likely pathogenic                            | 2,519   |
| <input checked="" type="checkbox"/> | Uncertain significance                       | 56,789  |
| <input checked="" type="checkbox"/> | Likely benign                                | 49,484  |
| <input checked="" type="checkbox"/> | Benign                                       | 92,481  |
| <input checked="" type="checkbox"/> | Conflicting interpretations of pathogenicity | 3,159   |
| <input checked="" type="checkbox"/> | Drug response                                | 446     |
| <input checked="" type="checkbox"/> | Association                                  | 176     |
| <input checked="" type="checkbox"/> | Risk factor                                  | 235     |
| <input checked="" type="checkbox"/> | Protective                                   | 43      |
| <input checked="" type="checkbox"/> | Affects                                      | 49      |
| <input checked="" type="checkbox"/> | Other                                        | 262     |
| <input checked="" type="checkbox"/> | Not provided                                 | 1,515   |
| <input checked="" type="checkbox"/> | Association_not found                        | 2       |

**Consequence** ^

# Supplementary Fig.2 How to access individual-level genome data in JGA

**a** Identify the allele frequency dataset (GEM-J WGA) that contains the variant of interest. **b** Focus on hum0184 among the six individual-level genomic datasets of GEM-J WGA. **c** Obtain an overview of the hum0184 dataset in the NBDC human database. **d** Submit a data-use application.

**a**

**TogoVar** A comprehensive Japanese genetic variation database **GRCh37** Home **Datasets** Downloads API Terms Contact About History Help

**TogoVar datasets (GRCh37)**

## Variant frequencies for which you can apply for use of individual-level data\*<sup>1</sup> to the NBDC human databases\*<sup>2</sup>

Click the links at the Included controlled-access datasets to apply for use of individual-level data

| Variant dataset name                                                 | Analysis method | Target population | Healthy subjects | Affected subjects | Sample size | Number of variants (# of sites) | Included controlled-access datasets |
|----------------------------------------------------------------------|-----------------|-------------------|------------------|-------------------|-------------|---------------------------------|-------------------------------------|
| <a href="#">GEM Japan Whole Genome Aggregation (GEM-J WGA) Panel</a> | WGS             | Japanese          | ✓                |                   | 7,609       | 95,863,463 (90,280,248)         | <b>6 datasets</b>                   |
| <a href="#">JGA-NGS</a>                                              | WES             | Japanese          | ✓                | ✓                 | 125         | 4,679,025                       | <a href="#">7 datasets</a>          |
| <a href="#">JGA-SNP</a>                                              | SNP-Chip        | Japanese          | ✓                | ✓                 | 183,884     | 1,249,724                       | <a href="#">3 datasets</a>          |

\*1 : fastq/bam/cel files and/or lists of genotype data etc.  
 \*2 : [Japanese Genotype-phenotype Archive \(JGA\)](#) / [AMED Genome group sharing Database \(AGD\)](#)

**b**

## WGS datasets used for joint variant calling [Controlled access]

If you would like to use the datasets, apply for data use of them whose ID begins with "JGAD" and "AGDS" to [the NBDC Human database](#) and [the AMED group sharing database](#), respectively.

| Dataset ID (NBDC research ID)              | Study title                                                                        | Participants                                                    | Sample size  | Data provider                                 |
|--------------------------------------------|------------------------------------------------------------------------------------|-----------------------------------------------------------------|--------------|-----------------------------------------------|
| <a href="#">JGAD000220 (hum0014)</a>       | The Tailor-made Medical Treatment Program (BioBank Japan: BBJ)                     | The cohort participants registered in the BBJ from 2003 to 2007 | 768          | BioBank Japan                                 |
| <a href="#">AGDS_00000000005 (agd0008)</a> | バイオバンク・ジャパンの運営・管理と個別化医療の実現に向けた疾患バイオマーカー探索 (English page is under construction)     | 心筋梗塞、胃がん (非腫瘍組織)、認知症                                            | 2,089        | BioBank Japan                                 |
| <a href="#">JGAD000117 (hum0103)</a>       | To investigate genomic alterations of Japanese biliary tract cancers               | Biliary tract cancer (non-tumor tissue)                         | 17           | RIKEN Center for Integrative Medical Sciences |
| <a href="#">JGAD000228 (hum0158)</a>       | To investigate genomic alterations of Japanese liver cancers                       | Liver cancer (non-tumor tissue)                                 | 220          | RIKEN Center for Integrative Medical Sciences |
| <a href="#">JGAD000233 (hum0160)</a>       | To investigate genomic alterations of Japanese esophageal squamous cell carcinomas | Esophageal squamous cell carcinoma (non-tumor tissue)           | 20           | RIKEN Center for Integrative Medical Sciences |
| <a href="#">JGAD000338 (hum0184)</a>       | Construction of Japanese Whole-Genome database                                     | General residents                                               | 4,495        | Tohoku Medical Megabank Organization          |
| <b>Total</b>                               |                                                                                    |                                                                 | <b>7,609</b> |                                               |

Note: Those datasets above provide fastq/bam file formatted data. The result data will be shown in our database soon. The sample size of each dataset indicates the sample number after quality control in this current study.

**c**

**Human data** NBDC Human Database Japanese Site Search

Home **Data Use** Data Submission Guidelines Off-premise Server Data Access Committee Publications Contact us

**NBDC Research ID: hum0184.v1**

**SUMMARY**

**Aims:** Tohoku University Tohoku Medical Megabank Organization (ToMMo) and Iwate Tohoku Medical Megabank Organization (IMM) were founded to establish an advanced medical system to foster the reconstruction from the Great East Japan Earthquake. These organizations are developing a biobank that includes medical and genome information for supporting health and welfare in the Tohoku area. In the first stage, the part of our mission was to sequence the 4,000 individuals to construct Japanese whole-genome reference panel.

**Methods:** Whole genome sequencing

**Participants/Materials:** 4,566 Japanese general residents

**URL :** <https://jmorp.megabank.tohoku.ac.jp/>

| Data Set ID | Type of Data | Criteria                    | Release Date |
|-------------|--------------|-----------------------------|--------------|
| JGAS000239  | NGS (WGS)    | Controlled Access (Type II) | 2020/09/01   |

\*Release Note  
 \* Data users need to apply the [Form 2 \(Application Form for Using NBDC Human Data\)](#) to reach the Controlled Access Data. [Learn more](#)

**MOLECULAR DATA**

**JGAS000239**

|                                 |                                     |
|---------------------------------|-------------------------------------|
| Participants/Materials:         | 4,566 Japanese general residents    |
| Targets                         | WGS                                 |
| Target Loci for Capture Methods | -                                   |
| Platform                        | Illumina [HiSeq 2500, NovaSeq 6000] |

**d**

**NBDC** Application system for the NBDC Human Database Japanese English

Menu  
 IDP  
 Application for data use  
 Application for data submission  
 Create Group  
 My Data User Groups  
 My Data Submitter Groups

**New Application**

Group: PI Research collaborator Study Ethics review Attachments Overview

**Information on the principal investigator (PI)**

\* Last Name (in Japanese):  \* First Name (in Japanese):

Name:

\* Telephone number:

E-mail address:

\* Affiliated institution (in Japanese):

\* Division (in Japanese):

Affiliated institution:

Division:

\* Job title (in Japanese):

\* Job title:

Mailing address:

**Information on the head of the affiliated institution**

\* Name:  \* Job title:

\* Telephone number:  \* E-mail address:
